# Supplementary material
Source: ML conference proceedings conference paper supplement (https://proceedings.neurips.cc/paper_files/paper/2012/hash/c0c7c76d30bd3dcaefc96f40275bdc0a-Abstract.html)
Supplement: Supplementary file [file c0c7c76d30bd3dcaefc96f40275bdc0a-Supplemental.zip]

---

# Dynamic Pruning of Factor Graphs for Maximum Marginal Prediction – Supplemental Material –

---

**Christoph H. Lampert**

IST Austria (Institute of Science and Technology Austria)

Am Campus 1, 3400 Klosterneuburg, Austria

<http://www.ist.ac.at/~chl>    chl@ist.ac.at

The supplemental material contains larger and more complete versions plots of the figures in the main manuscript.

## Adaptive Sampling for Maximum Marginal Prediction

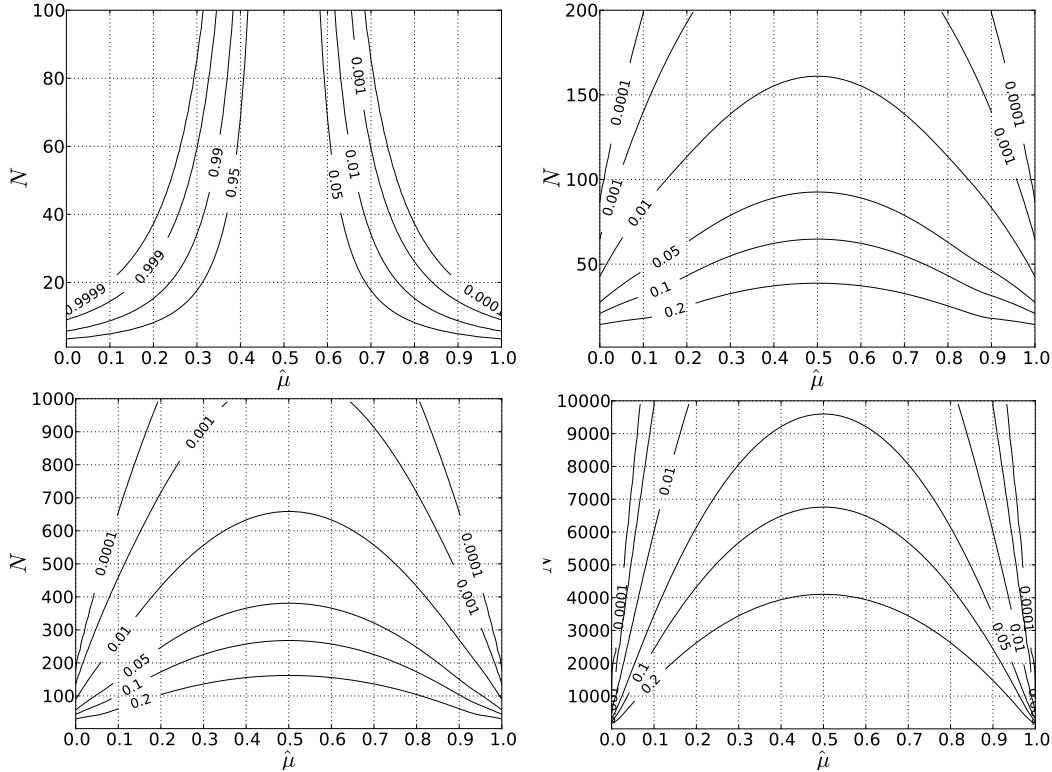

Figure 1: Illustration that maximum marginal decision is easier than marginal estimation if the marginal distribution is far from 0.5. We assume we have observed  $N$  i.i.d. samples from a distribution with  $p(x = 1) = \mu$ . Top left: expected confidence of  $\mu \leq 0.5$ , i.e. decision  $z = 0$ . Other plots: confidence that  $\mu \in [\mu - \delta, \mu + \delta]$  for  $\delta = 0.1$  (top right),  $\delta = 0.05$  (bottom left) and  $\delta = 0.01$  (bottom right). Note the differently scaled  $y$ -axis.

## Multi-label classification

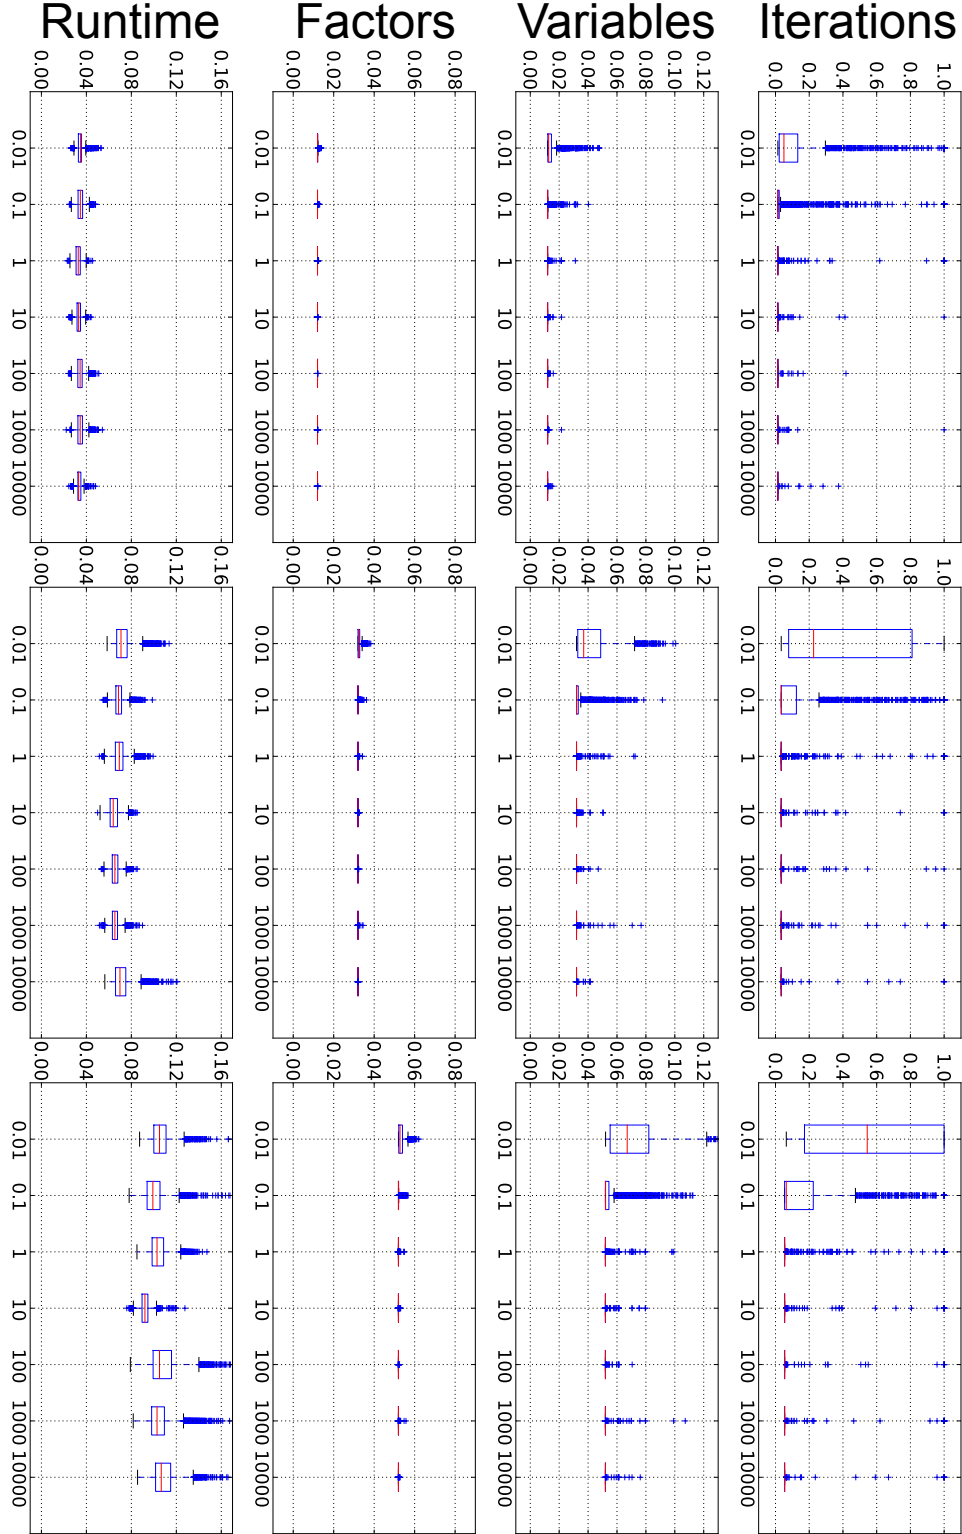

Figure 2: Results of adaptive pruning on RCV1 dataset for  $\epsilon = 10^{-2}, 10^{-5}, 10^{-8}$  (left to right).  $x$ -axis: regularization parameter  $C$  used for training,  $y$ -axis: ratio of iterations/variables/factors/runtime used by adaptive sampling relative to 500 iterations Gibbs sampling.

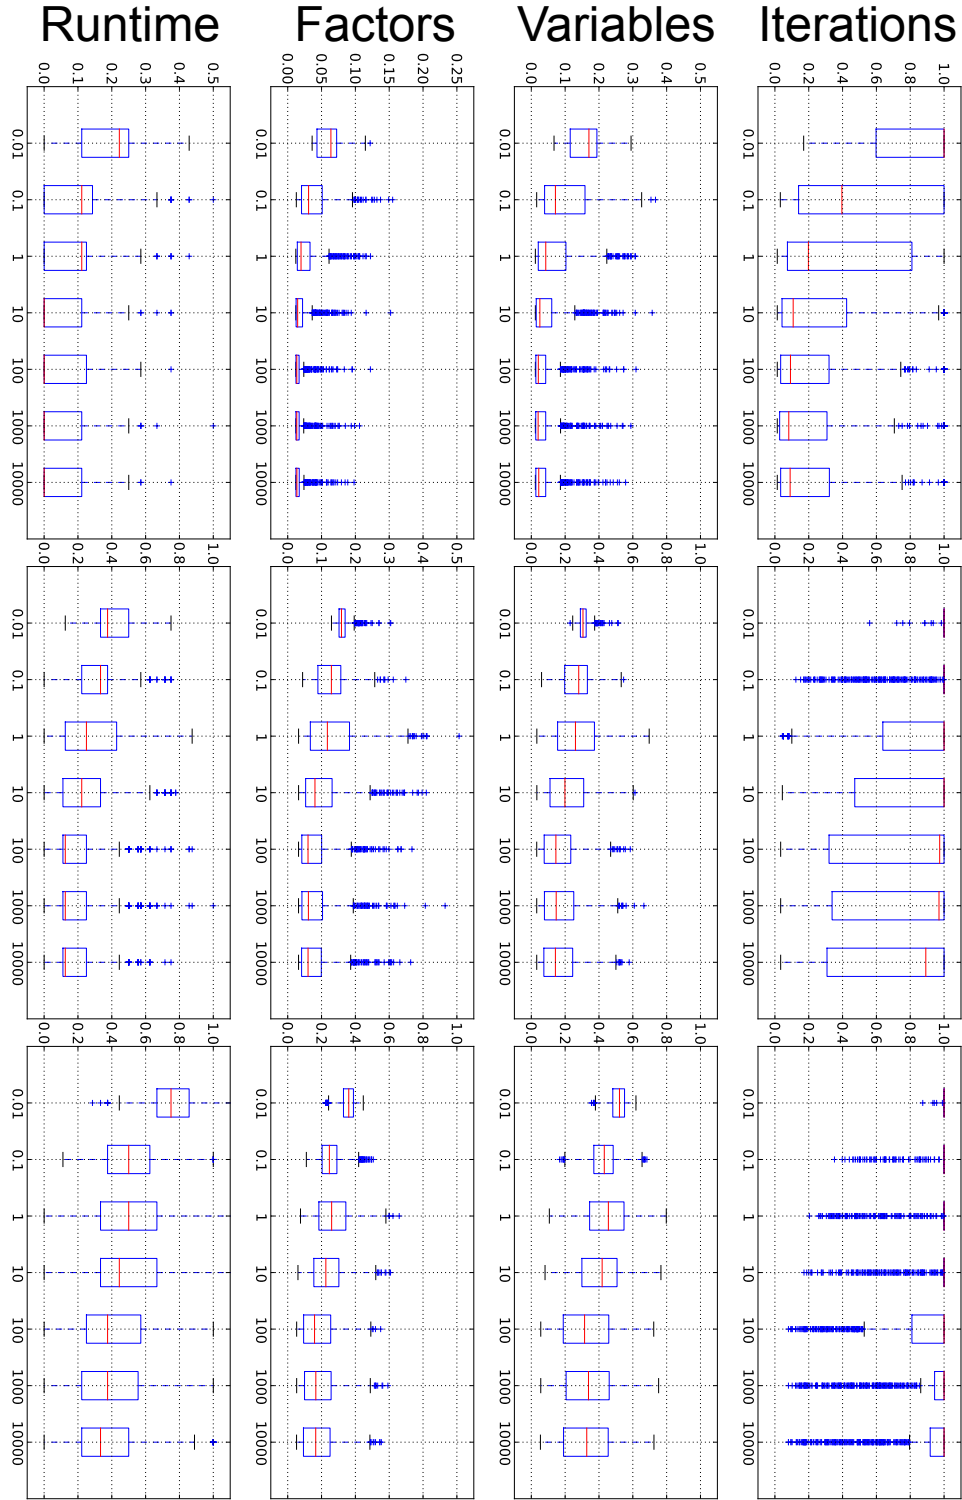

Figure 3: Results of adaptive pruning on YEAST dataset for  $\epsilon = 10^{-2}, 10^{-5}, 10^{-8}$  (left to right).  $x$ -axis: regularization parameter  $C$  used for training,  $y$ -axis: ratio of iterations/variables/factors/runtime used by adaptive sampling relative to 500 iterations Gibbs sampling. Beware that the scaling of the  $y$ -axis changes between columns.

### Image inpainting

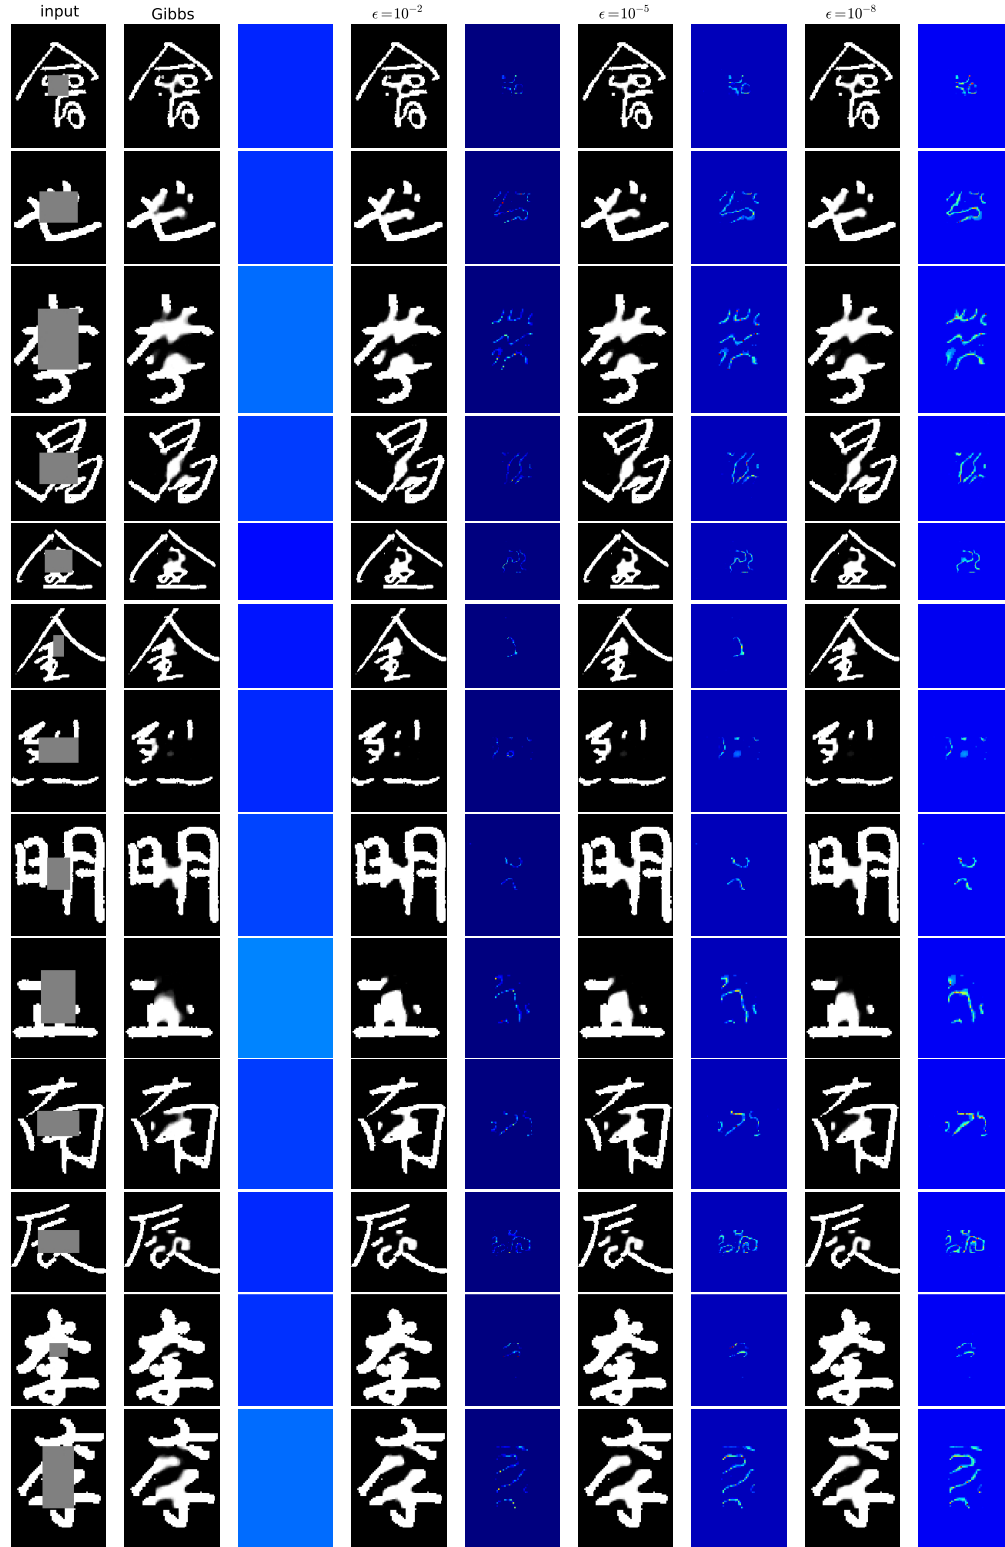

Figure 4: Example results of binary image inpainting on HECC dataset, images 1–13. Images where the  $\epsilon = 10^{-8}$  results is identical to Gibbs are cases where no decision became confident enough within the time limit.

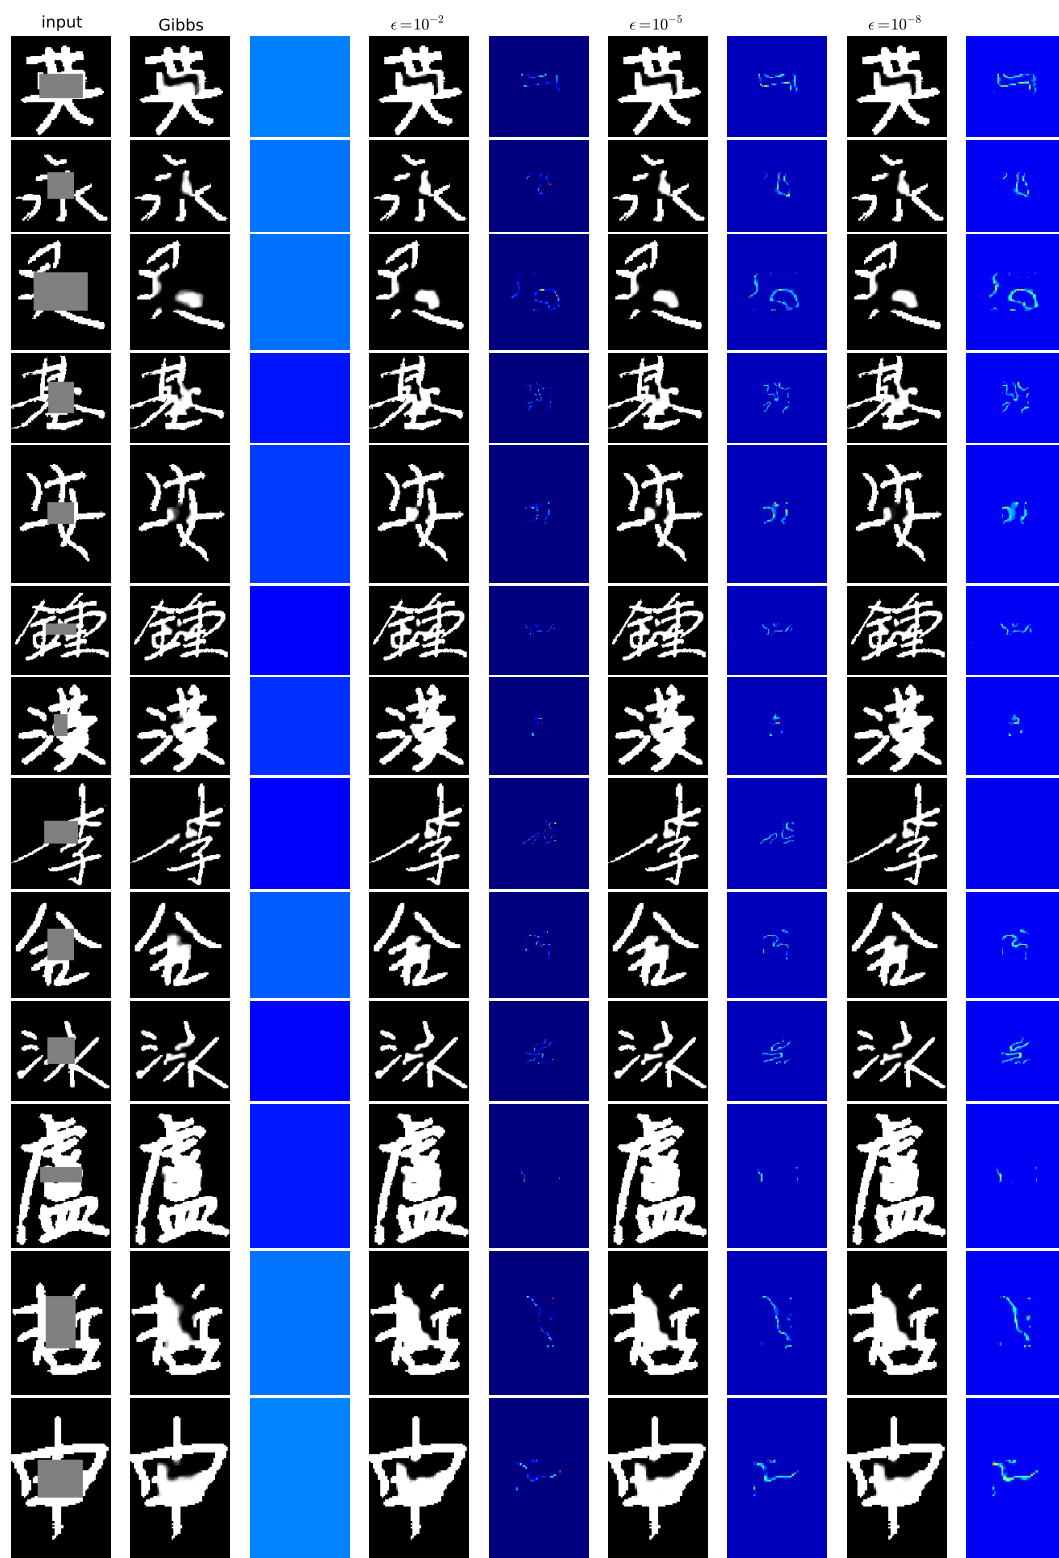

Figure 5: Example results of binary image inpainting on HECC dataset, images 14–26.

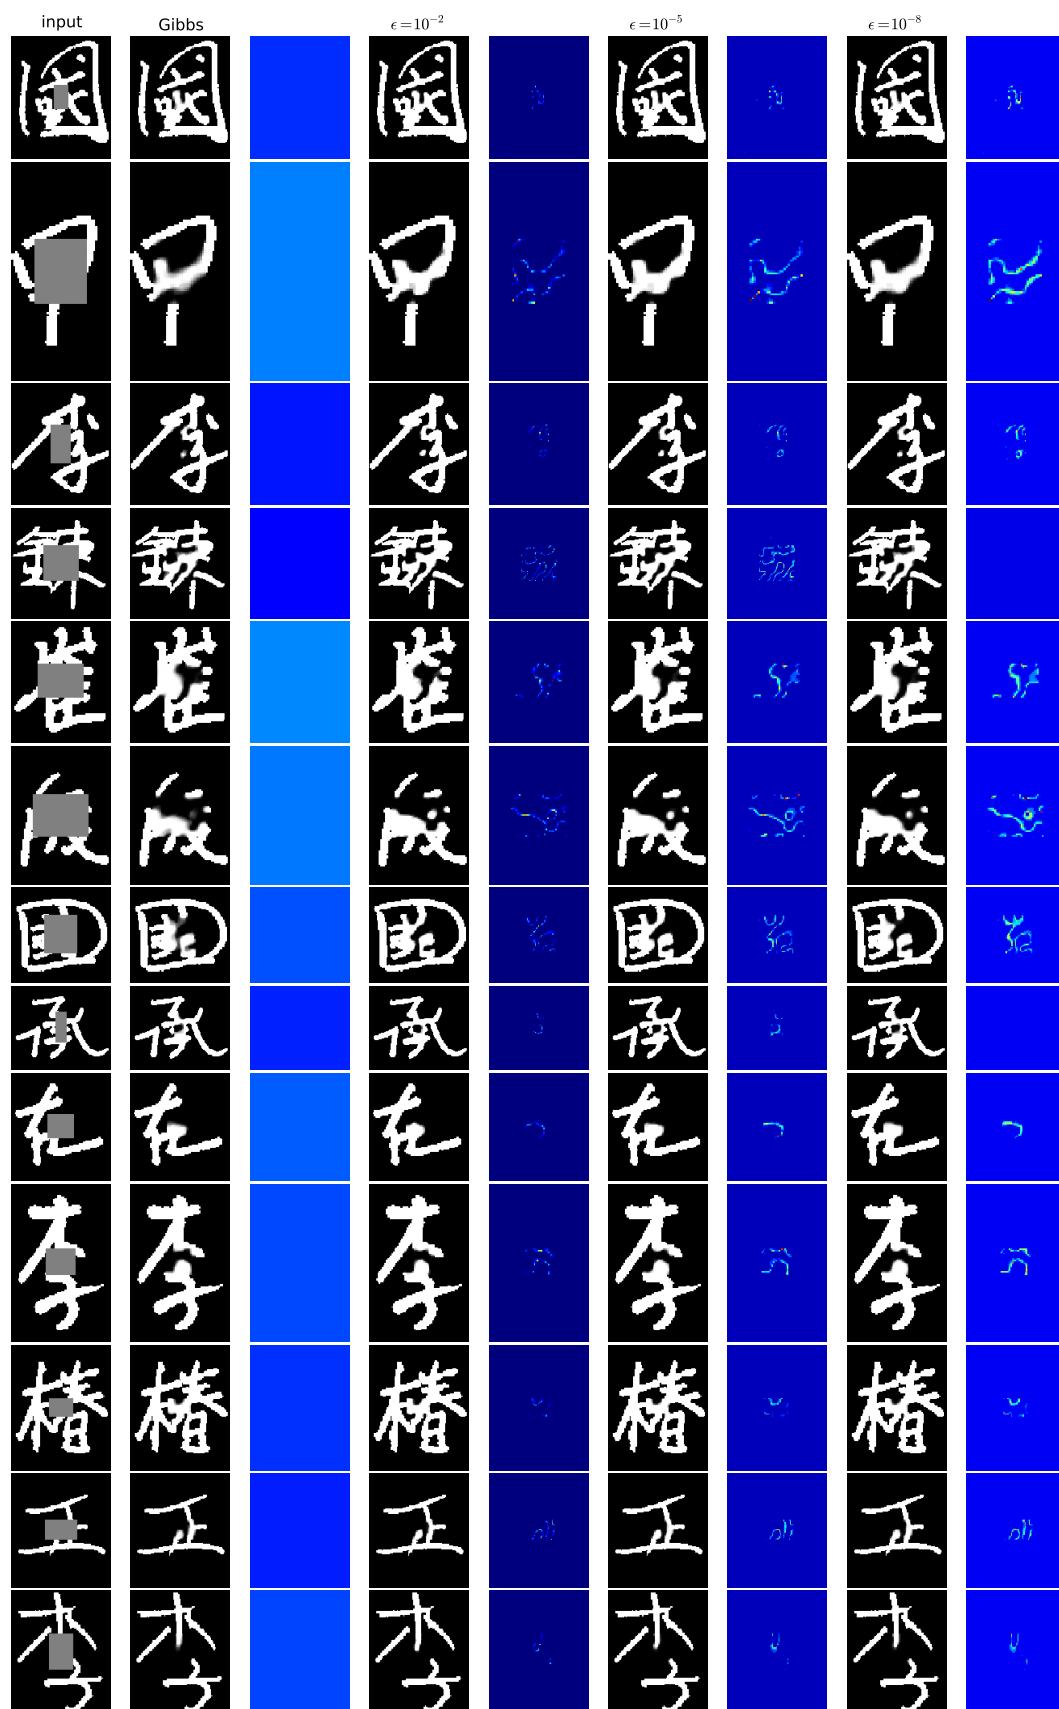

Figure 6: Example results of binary image inpainting on HECC dataset, images 26–39.

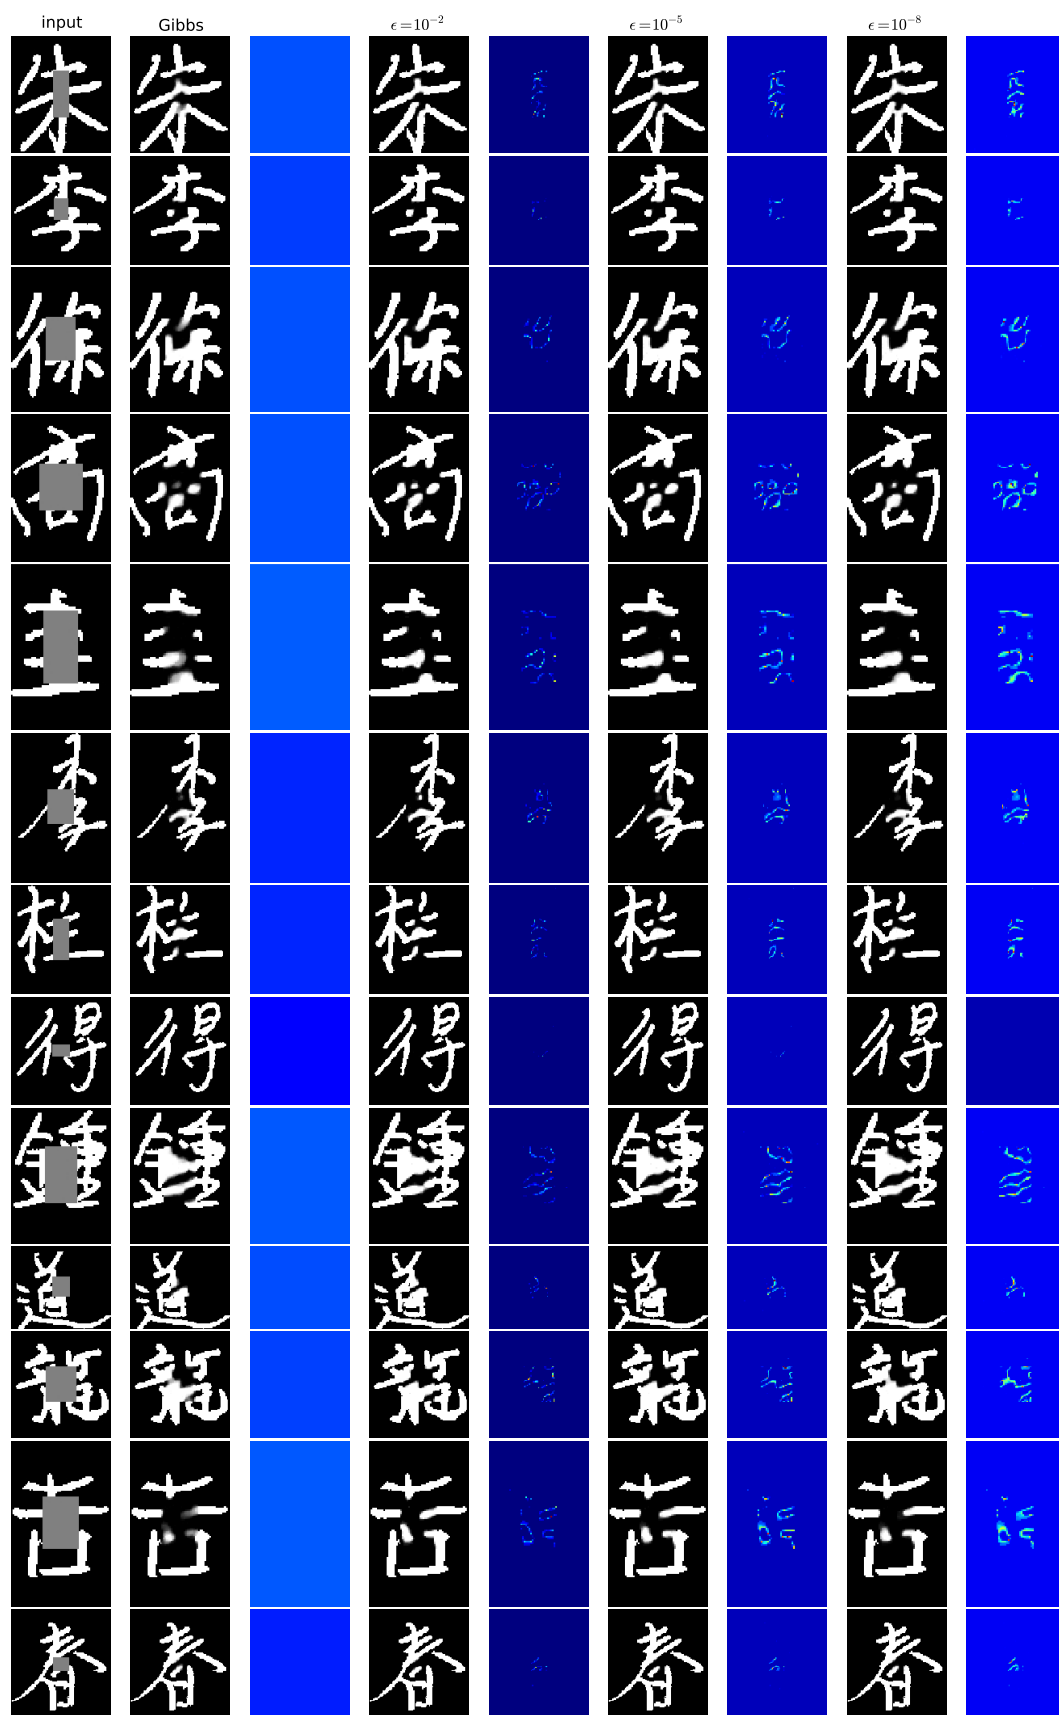

Figure 7: Example results of binary image inpainting on HECC dataset, images 40–52.

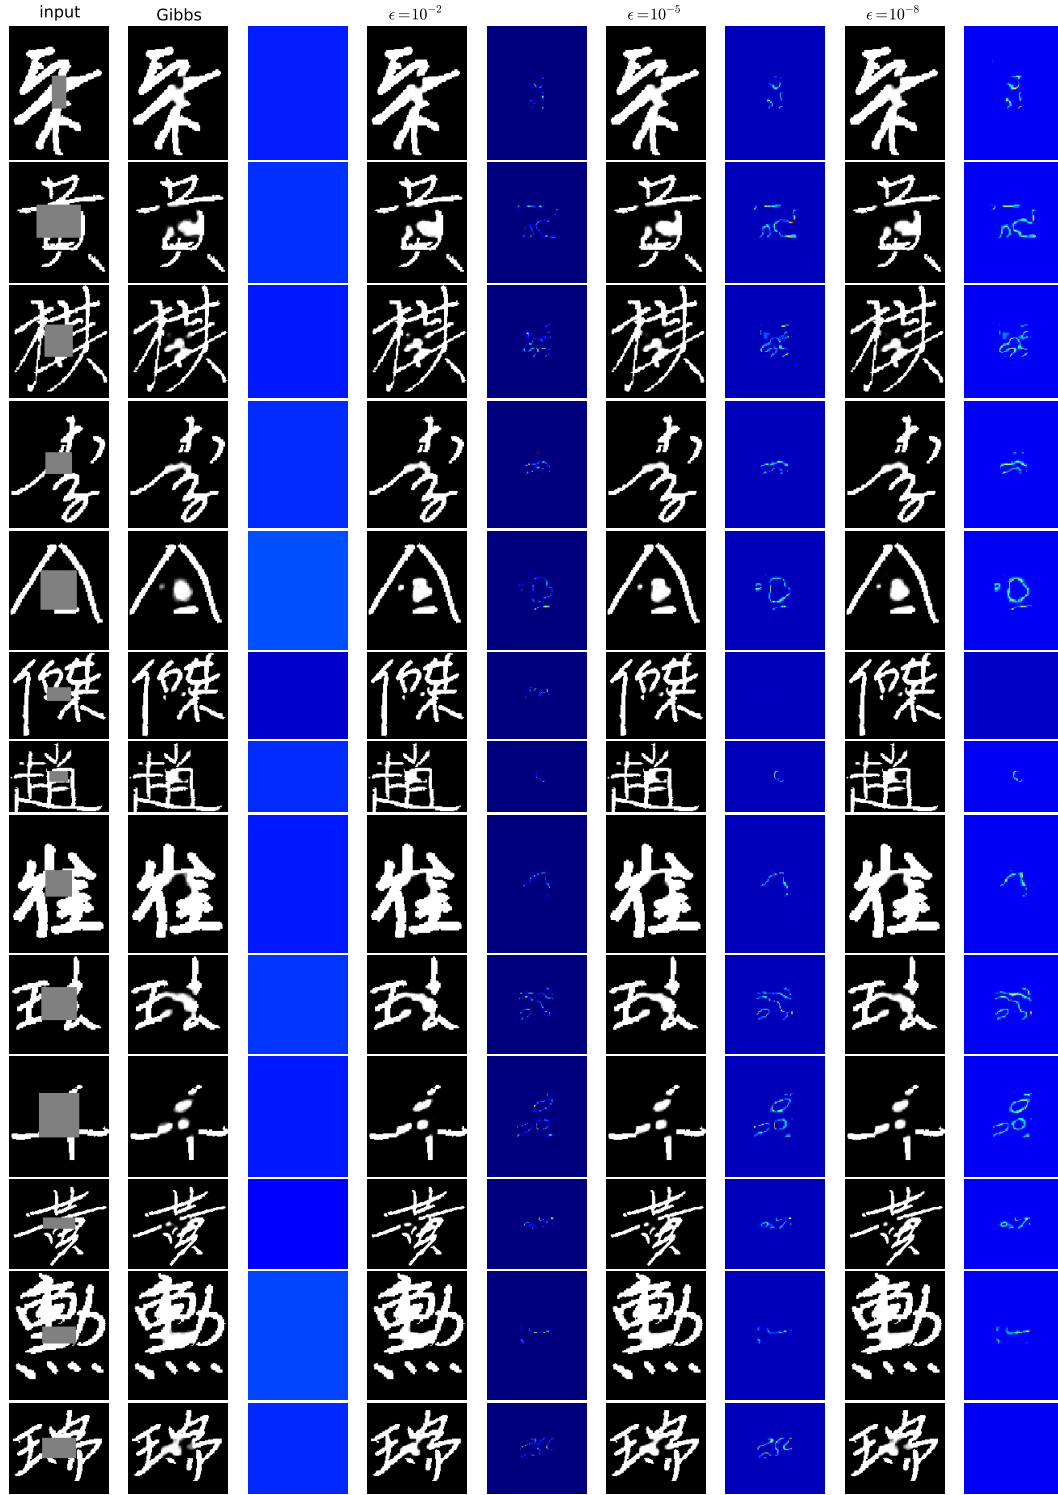

Figure 8: Example results of binary image inpainting on HECC dataset, images 53–65.



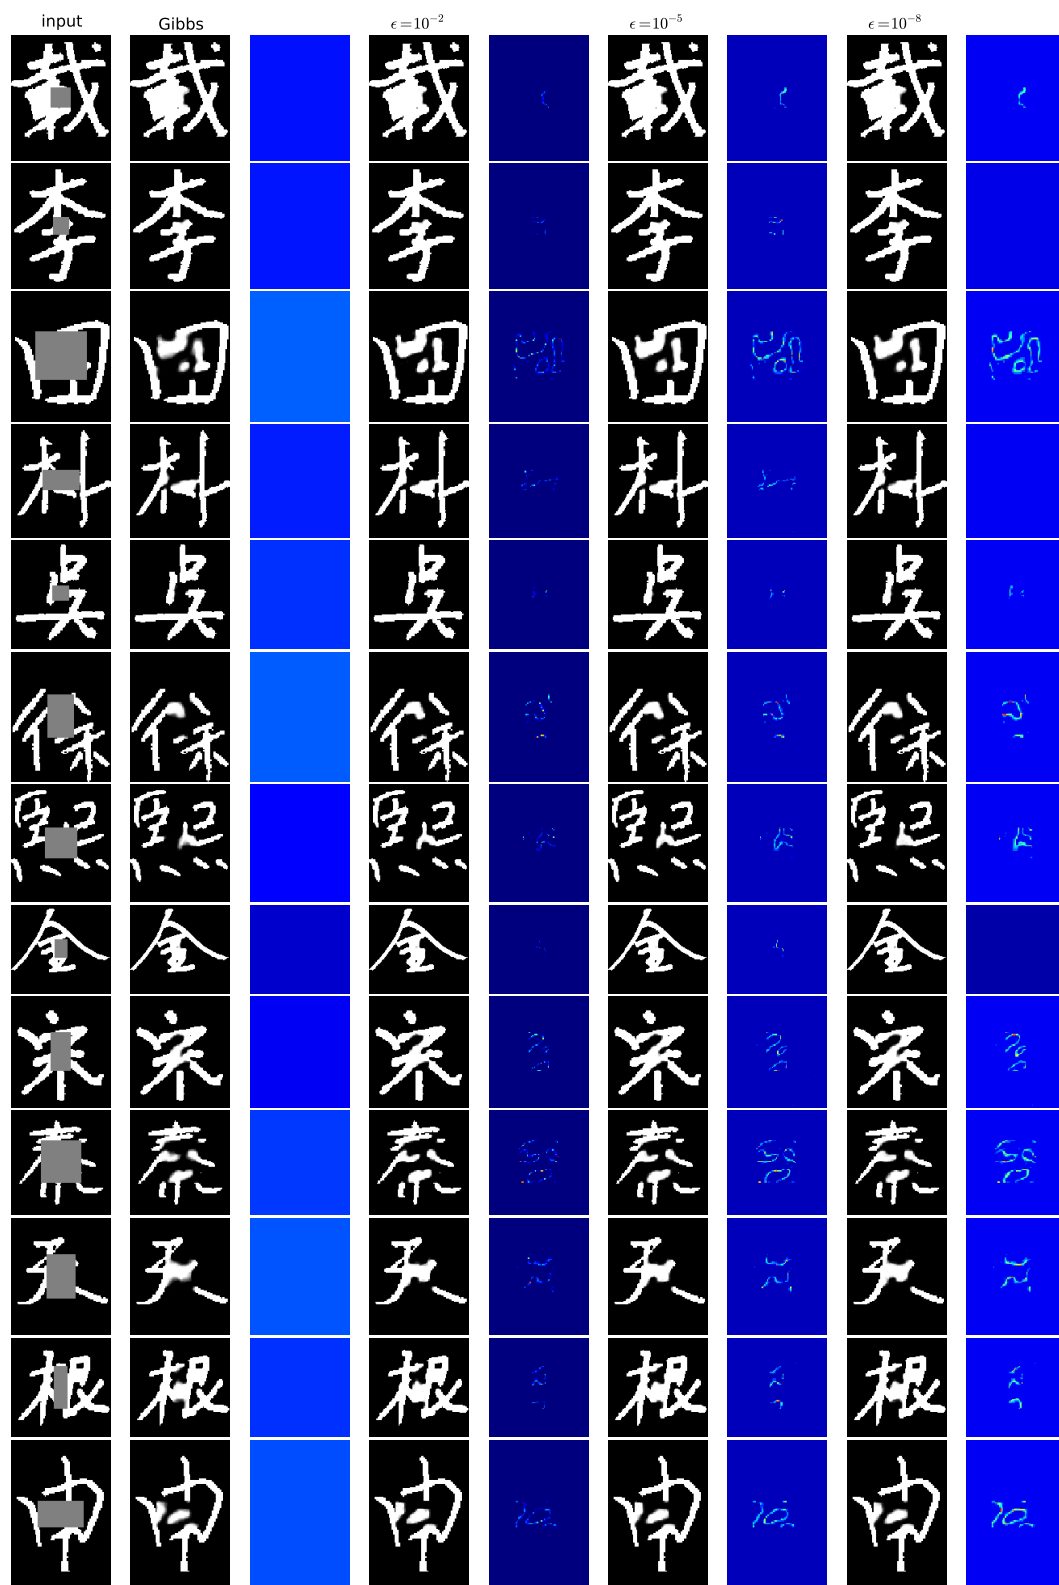

Figure 9: Example results of binary image inpainting on HECC dataset, images 66–78.

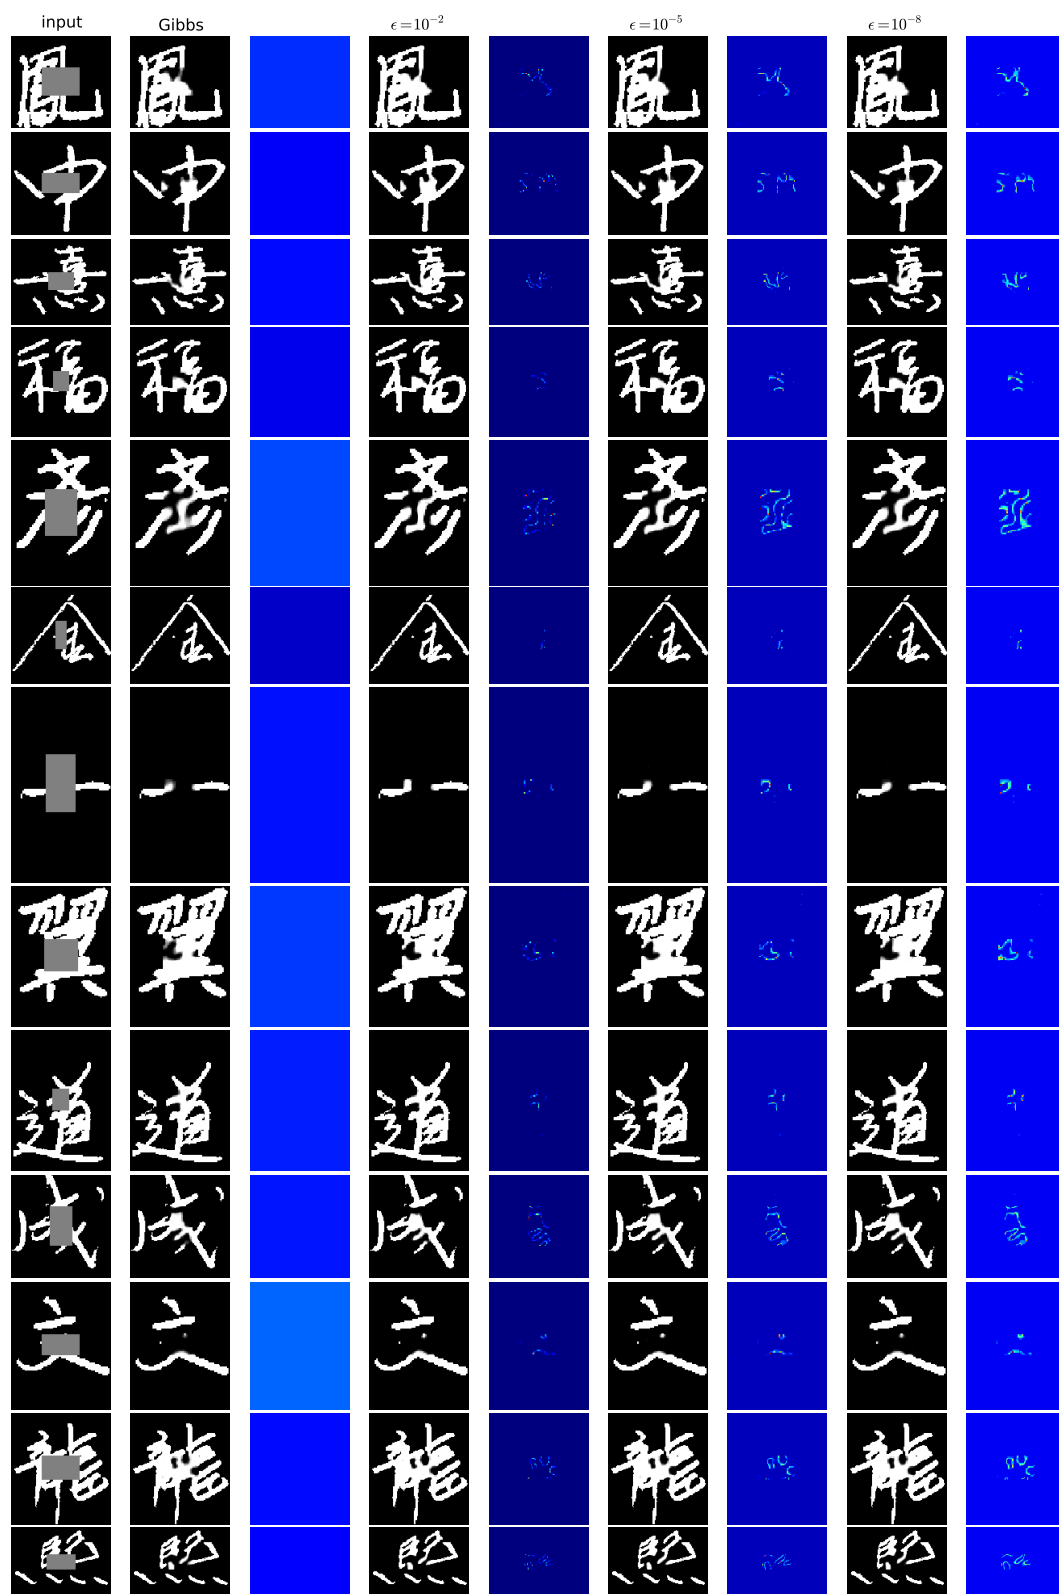

Figure 10: Example results of binary image inpainting on HECC dataset, images 79–91.

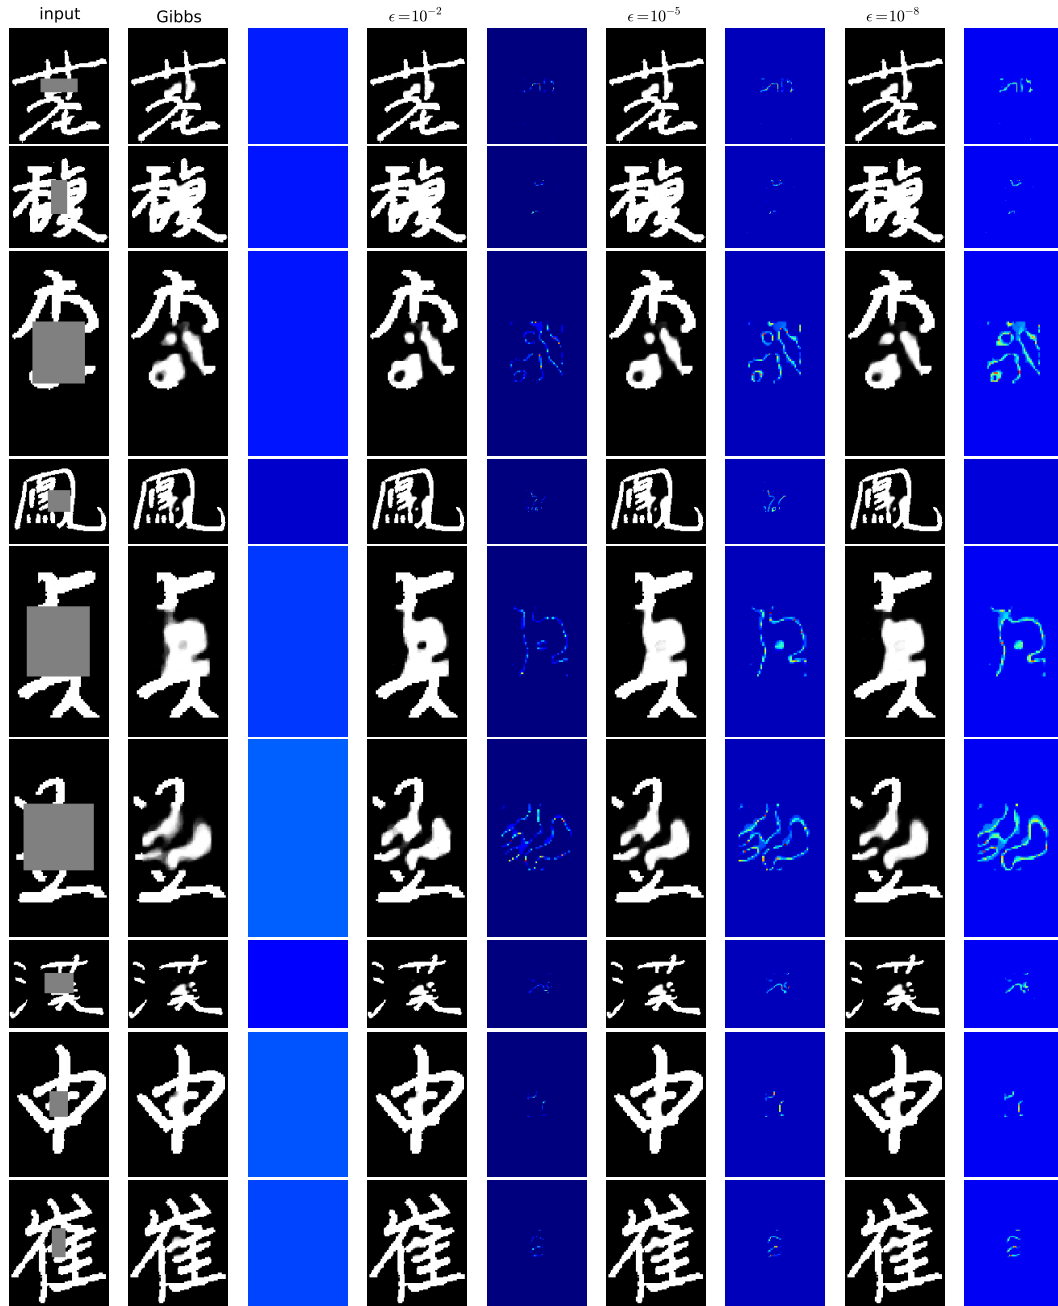

Figure 11: Example results of binary image inpainting on HECC dataset, images 92-100.
